# Supplementary material for: Adipose METTL14‐Elicited N6‐Methyladenosine Promotes Obesity, Insulin Resistance, and NAFLD Through Suppressing β Adrenergic Signaling and Lipolysis
Source: PubMed Central journal article supplement (PMC10558699; doi:10.1002/advs.202301645), 2023-08-01
Supplement: ADVS-10-2301645-s001.pdf [file ADVS-10-2301645-s001.pdf]

## Supporting Information

for *Adv. Sci.*, DOI 10.1002/advs.202301645

Adipose METTL14-Elicited N<sup>6</sup>-Methyladenosine Promotes Obesity, Insulin Resistance, and NAFLD Through Suppressing  $\beta$  Adrenergic Signaling and Lipolysis

*Qianqian Kang, Xiaorong Zhu, Decheng Ren, Alexander Ky, Ormond A. MacDougald, Robert W. O'Rourke and Liangyou Rui\**

## Supporting Information

**Adipose Mettl14-elicited N<sup>6</sup>-methyladenosine promotes obesity, insulin resistance, and NAFLD through suppressing  $\beta$  adrenergic signaling lipolysis**

*Qianqian Kang, Xiaorong Zhu, Decheng Ren, Alexander Ky, Ormond MacDougald, Robert W. O'Rourke, Liangyou Rui\**

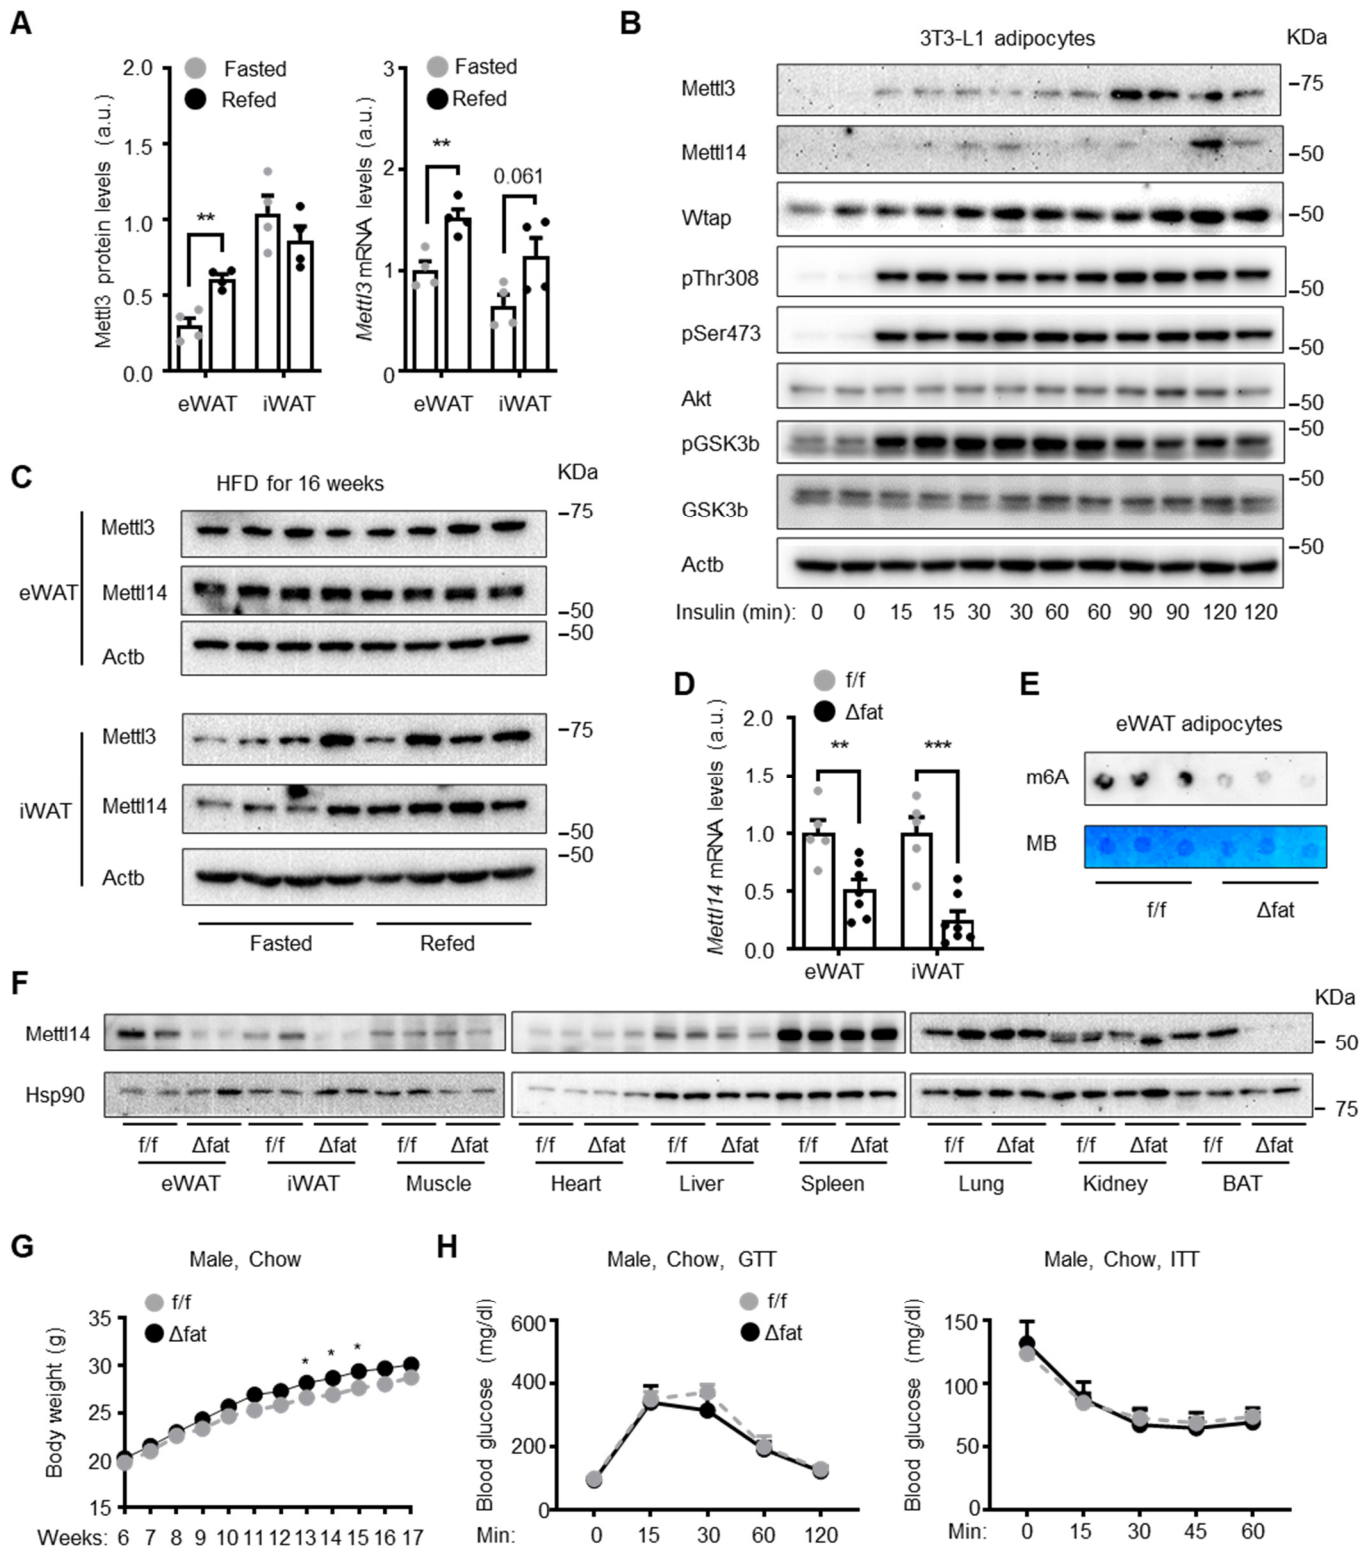

**Figure S1. *Mett14*<sup>Δfat</sup> mice are normal on chow diet.** **A**) C57BL/6J male mice (8 weeks old) were fasted overnight and then re-fed for 3 h. *Mett13* protein (normalized to Actb) and mRNA (normalized to 36B4) levels were measured in eWAT and iWAT by immunoblotting and qPCR, respectively (n=4 mice per group), as described in Figure 1A. a.u.: arbitrary unit. **B**) 3T3-L1 cells were differentiated into adipocytes and stimulated with 5 μg/ml insulin for the indicated durations. Cell extracts were immunoblotted with the indicated antibodies. **C**) C57BL/6J male mice (8 weeks old) were fed a HFD for 16 weeks and then fasted overnight and re-fed for 3 h. WAT extracts were immunoblotted with the indicated antibodies. **D**) *Mett14*

mRNA levels were measured in iWAT and eWAT (24 weeks old) by qPCR and normalized to 36B4 levels. a.u.: arbitrary unit. *Mettl14<sup>ff</sup>*: n=5, *Mettl14<sup>Δfat</sup>*: n=7. **E**) Primary adipocytes were isolated from eWAT, and total RNA was extracted for m6A dot blot assays. **F**) Tissues were harvested from *Mettl14<sup>ff</sup>* and *Mettl14<sup>Δfat</sup>* male mice at 24 weeks of age. Tissue extracts were immunoblotted with antibodies to Mettl14 and Hsp90. **G-H**) *Mettl14<sup>ff</sup>* and *Mettl14<sup>Δfat</sup>* male mice were placed on chow diet. **G**) Growth curves. *Mettl14<sup>ff</sup>*: n=7, *Mettl14<sup>Δfat</sup>*: n=5. **H**) GTT and ITT at 18 weeks of age. *Mettl14<sup>ff</sup>*: n=7, *Mettl14<sup>Δfat</sup>*: n=5. Data are presented as mean ± SEM. \*p<0.05, \*\*p<0.01, \*\*\*p<0.001, Student's *t* test.

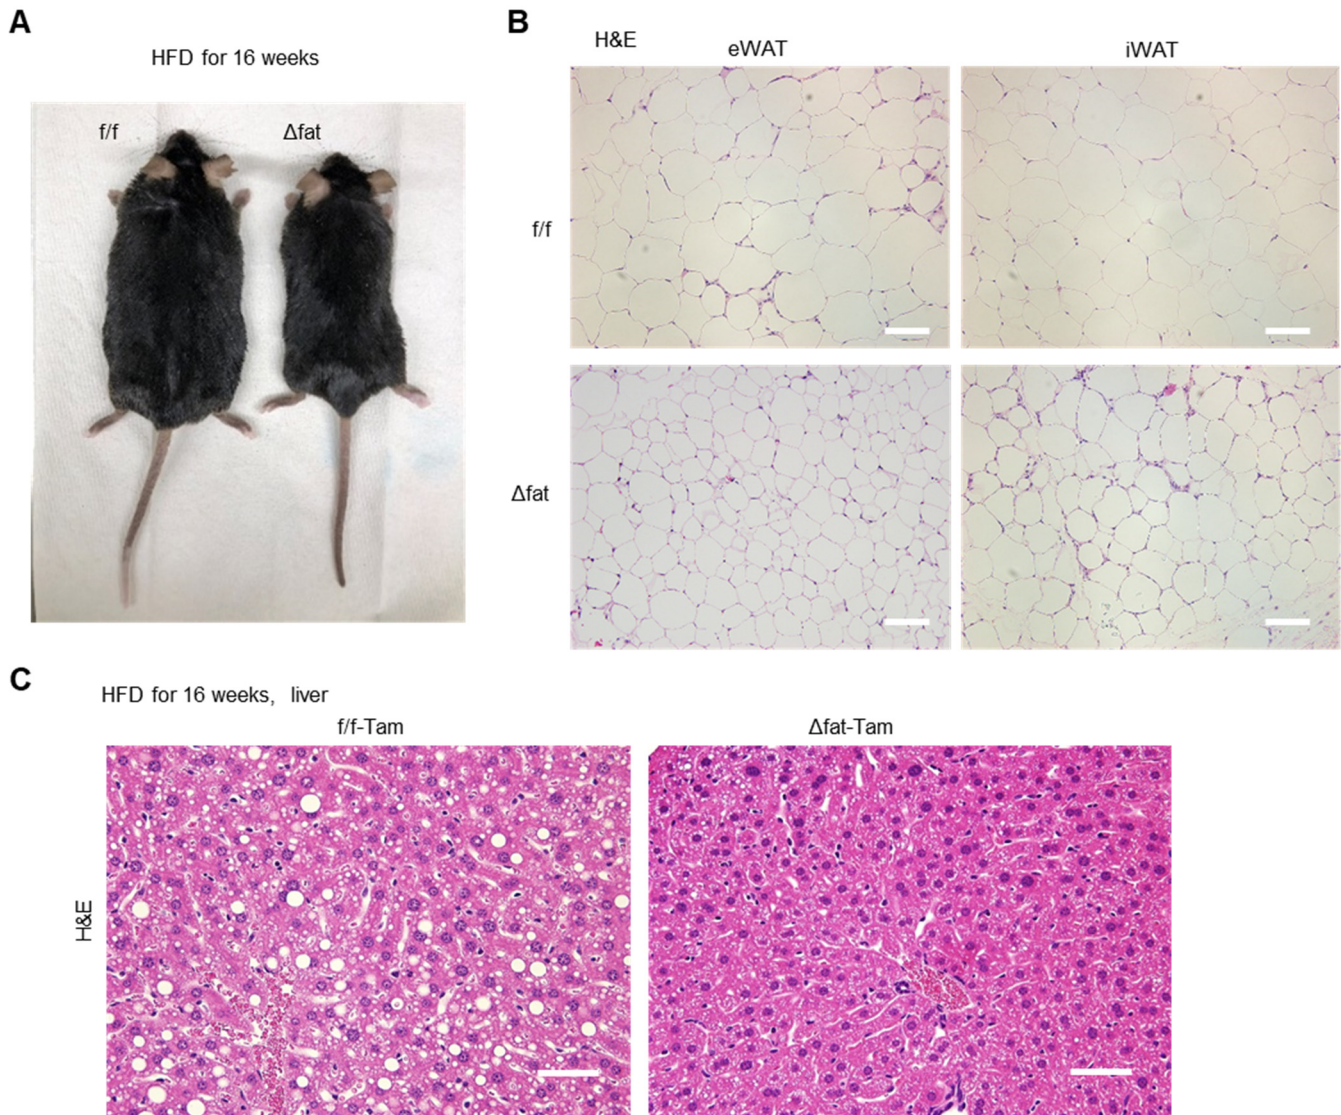

**Figure S2. *Mettl14<sup>Δfat</sup>* mice are resistant to HFD-induced obesity and NAFLD.** **A-B**) *Mettl14<sup>ff</sup>* and *Mettl14<sup>Δfat</sup>* male mice (8 weeks) were fed a HFD for 16 weeks. **A**) Mouse images. **B**) H&E staining of iWAT and eWAT sections. Scale bar: 200  $\mu$ m. **C**) H&E staining of liver sections. Scale bar: 50  $\mu$ m. *Mettl14<sup>ff</sup>-Tam* and *Mettl14<sup>Δfat</sup>-Tam* male mice (7 weeks) were injected with tamoxifen and one week later, they were fed a HFD for 10 weeks.



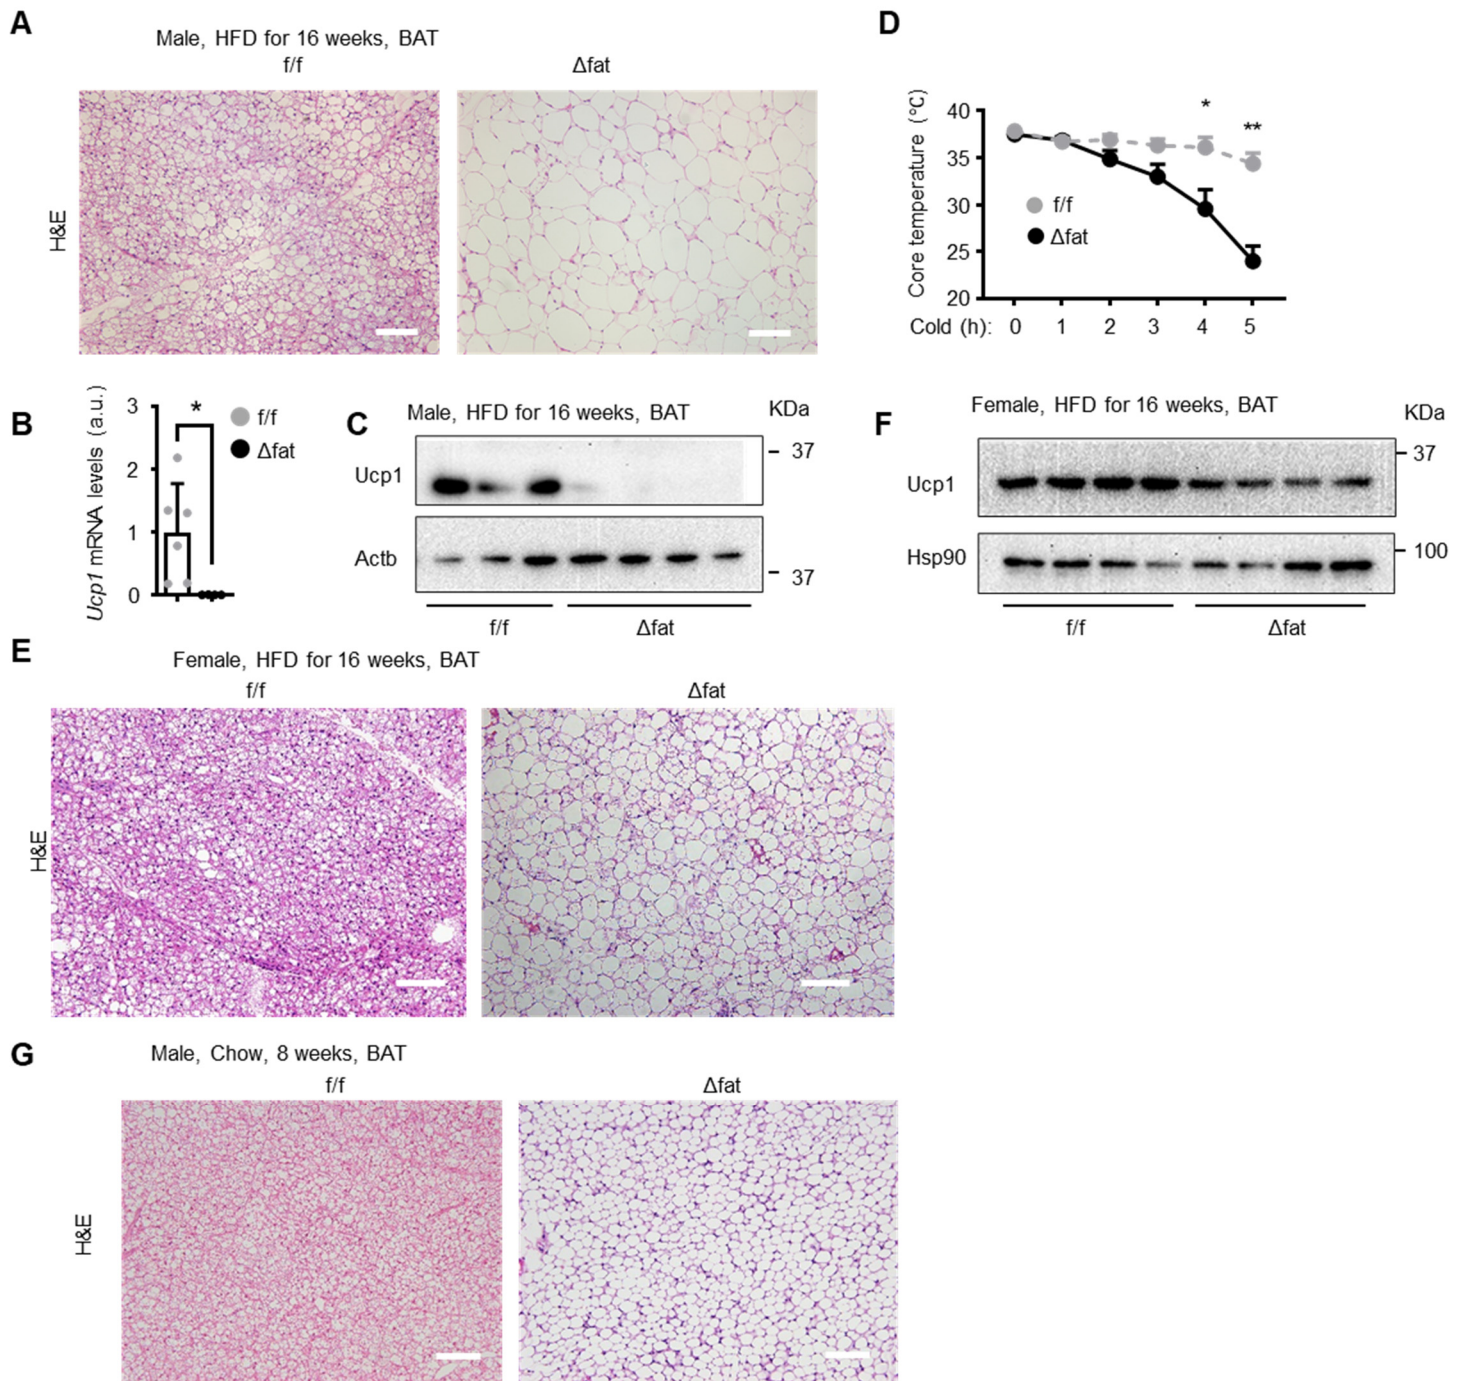

**Figure S3. *Mettl14*<sup>Δfat</sup> mice display BAT whitening and cold intolerance.** **A-D)** *Mettl14*<sup>f/f</sup> and *Mettl14*<sup>Δfat</sup> male mice (8 weeks) were fed a HFD for 16 weeks. **A)** H&E staining of BAT sections. Scale bar: 200 μm. **B)** *Ucp1* mRNA levels (normalized to 36B4 levels). a.u.: arbitrary unit. *Mettl14*<sup>f/f</sup>: n=6, *Mettl14*<sup>Δfat</sup>: n=4. **C)** BAT extracts were immunoblotted with antibodies to *Ucp1* and *Actb*. **D)** *Mettl14*<sup>f/f</sup> and *Mettl14*<sup>Δfat</sup> males (HFD for 12 weeks) were fasted overnight and exposed to 4°C cold temperature for 5 h in the absence of food. Rectal temperatures were monitored. *Mettl14*<sup>f/f</sup>: n=4, *Mettl14*<sup>Δfat</sup>: n=4. **E-F)** *Mettl14*<sup>f/f</sup> and *Mettl14*<sup>Δfat</sup> female mice (8 weeks) were fed a HFD for 16 weeks. **E)** H&E staining of BAT sections. **F)** BAT extracts were immunoblotted with antibodies to *Ucp1* and *Hsp90*. **G)** H&E staining of BAT sections at 8 weeks of age on chow diet. Data are presented as mean ± SEM. \*p<0.05, \*\*p<0.01, \*\*\*p<0.001, Student's *t* test (**B**) and 1-way ANOVA (**D**).

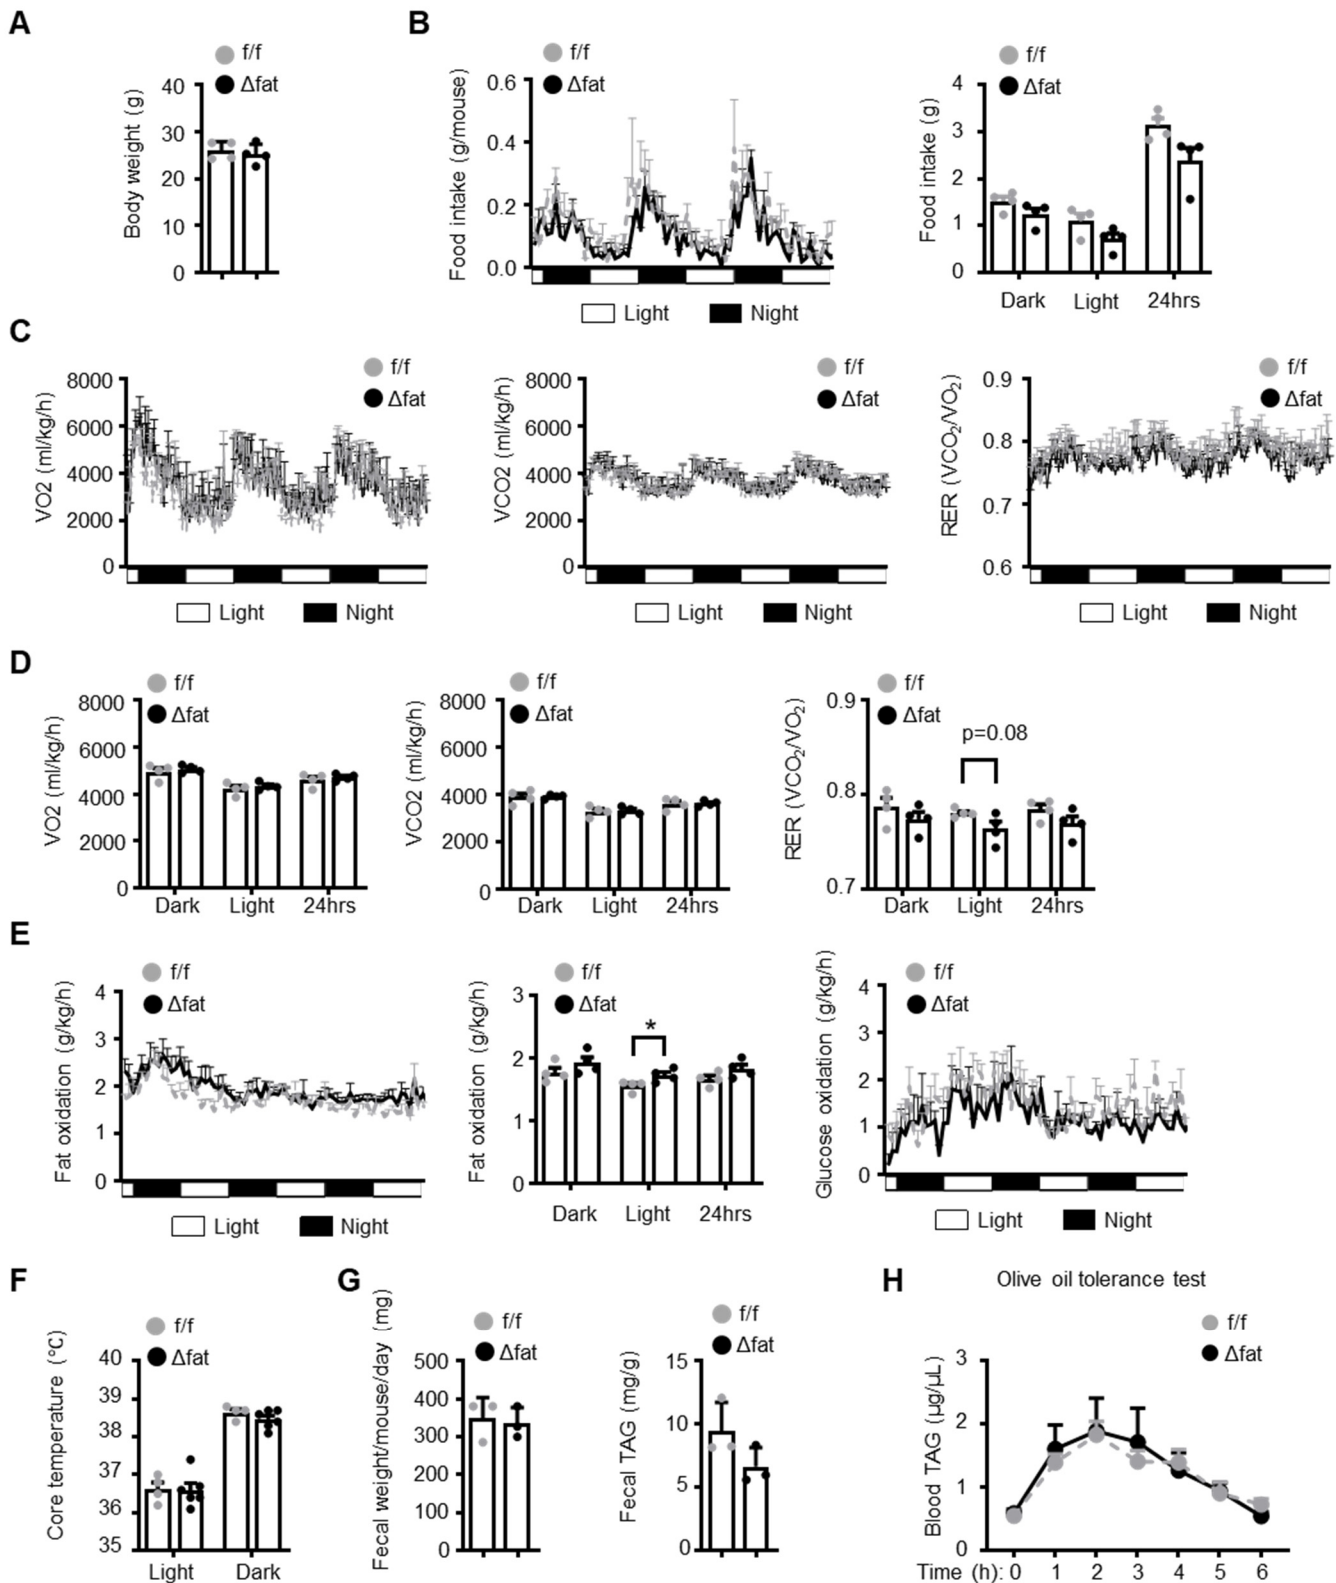

**Figure S4. *Mettl14<sup>Δfat</sup>* mice display normal food intake and energy expenditure. A-E) *Mettl14<sup>ff</sup>* and *Mettl14<sup>Δfat</sup>* males (8 weeks) were fed a HFD for one week and subjected CLAMS tests. **A)** Body weight. *Mettl14<sup>ff</sup>*: n=4, *Mettl14<sup>Δfat</sup>*: n=4. **B)** Food intake. Left: sampled at a 1 h-interval, right: average food intake in the dark, light, and dark/light phases. *Mettl14<sup>ff</sup>*: n=4, *Mettl14<sup>Δfat</sup>*: n=4. **C)**  $O_2$  consumption,  $CO_2$  production (normalized to lean body mass), and respiratory exchange ratio (RER) was sampled at a 24-min interval. Calculated energy expenditure (EE) plots over time. *Mettl14<sup>ff</sup>*: n=4, *Mettl14<sup>Δfat</sup>*: n=4. **D)** Average  $VO_2$ ,  $VCO_2$**

and energy expenditure (normalized to lean mass). *Mettl14<sup>f/f</sup>*: n=4, *Mettl14<sup>Δfat</sup>*: n=4. **E**) Fatty acid oxidation and glucose oxidation rates (sampled at a 24-min interval). **(F-H)** Male mice (8 weeks) were fed a HFD for 6 weeks. **F**) Body core temperature. *Mettl14<sup>f/f</sup>*: n=4, *Mettl14<sup>Δfat</sup>*: n=6. **G**) Feces weight and fecal TAG levels (normalized to feces weight, n=3 mice per group). **(H)** Mice were fasted overnight and administered with olive oil (5 ml/kg body weight, via oral gavage). Plasma TAG levels monitored post gavage. *Mettl14<sup>f/f</sup>*: n=4, *Mettl14<sup>Δfat</sup>*: n=6. Data are presented as mean ± SEM. \*p<0.05, \*\*p<0.01, \*\*\*p<0.001, Student's *t* test.

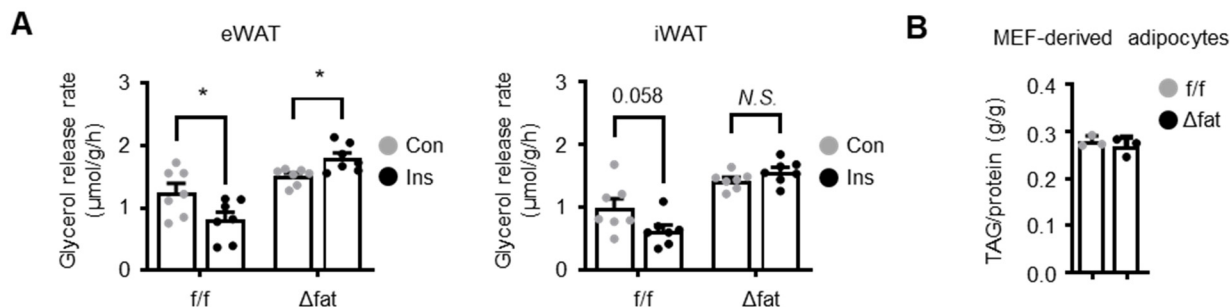

**C**

| Score          | Expect | Method                       | Identities   | Positives    | Gaps      |
|----------------|--------|------------------------------|--------------|--------------|-----------|
| 929 bits(2401) | 0.0    | Compositional matrix adjust. | 450/456(99%) | 453/456(99%) | 0/456(0%) |

|           |     |                                                               |     |
|-----------|-----|---------------------------------------------------------------|-----|
| Mouse     | 1   | MDSRLQEIRERQKLRQLLAQQLGAESADSIGAVLNSKDEQREIAETRETCRASDYDTSAP  | 60  |
| Conserved |     | MDSRLQEIRERQKLRQLLAQQLGAESADSIGAVLNSKDEQREIAETRETCRASDYDTSAP  |     |
| Human     | 1   | MDSRLQEIRERQKLRQLLAQQLGAESADSIGAVLNSKDEQREIAETRETCRASDYDTSAP  | 60  |
| Mouse     | 61  | NSKRKCLDEGETDEDKVEEYKDELEMQQEENLPYEEEIYKDSSTFLKGTQSLNPHNDYC   | 120 |
| Conserved |     | N+KRK LDEGETDEDK+EEYKDELEMQQ+EENLPYEEEIYKDSSTFLKGTQSLNPHNDYC  |     |
| Human     | 61  | NAKRKYLDEGETDEDKMEEYKDELEMQQDEENLPYEEEIYKDSSTFLKGTQSLNPHNDYC  | 120 |
| Mouse     | 121 | QHFVDTGHRPQNFIRDVGLADRFEEYPKLRELIRLKDDELIAKSNTPPMYLQADIEAFDIR | 180 |
| Conserved |     | QHFVDTGHRPQNFIRDVGLADRFEEYPKLRELIRLKDDELIAKSNTPPMYLQADIEAFDIR |     |
| Human     | 121 | QHFVDTGHRPQNFIRDVGLADRFEEYPKLRELIRLKDDELIAKSNTPPMYLQADIEAFDIR | 180 |
| Mouse     | 181 | ELTPKFDVILLEPPLEYYRETGITANEKCTWDDIMKLEIDEIAAPRSFIFLWCGSGEG    | 240 |
| Conserved |     | ELTPKFDVILLEPPLEYYRETGITANEKCTWDDIMKLEIDEIAAPRSFIFLWCGSGEG    |     |
| Human     | 181 | ELTPKFDVILLEPPLEYYRETGITANEKCTWDDIMKLEIDEIAAPRSFIFLWCGSGEG    | 240 |
| Mouse     | 241 | LDLGRVCLRKWGYRRCEDICWIKTNKNNPGTKTLDPKAVFQRTKEHCLMGIKGTVKRST   | 300 |
| Conserved |     | LDLGRVCLRKWGYRRCEDICWIKTNKNNPGTKTLDPKAVFQRTKEHCLMGIKGTVKRST   |     |
| Human     | 241 | LDLGRVCLRKWGYRRCEDICWIKTNKNNPGTKTLDPKAVFQRTKEHCLMGIKGTVKRST   | 300 |
| Mouse     | 301 | DGDFIHANVDIDLITTEPEIGNIEKPVEIFHIIEHFCLGRRRLHLFGRDSTIRPGWLTV   | 360 |
| Conserved |     | DGDFIHANVDIDLITTEPEIGNIEKPVEIFHIIEHFCLGRRRLHLFGRDSTIRPGWLTV   |     |
| Human     | 301 | DGDFIHANVDIDLITTEPEIGNIEKPVEIFHIIEHFCLGRRRLHLFGRDSTIRPGWLTV   | 360 |
| Mouse     | 361 | GPTLTNSNYNAETYASYFSAPNSYLTGCTEEIERLRPKSPPPKSKSDRGGGAPRGGGRGG  | 420 |
| Conserved |     | GPTLTNSNYNAETYASYFSAPNSYLTGCTEEIERLRPKSPPPKSKSDRGGGAPRGGGRGG  |     |
| Human     | 361 | GPTLTNSNYNAETYASYFSAPNSYLTGCTEEIERLRPKSPPPKSKSDRGGGAPRGGGRGG  | 420 |
| Mouse     | 421 | TSAGRGRERNRSNFRGERGGFRGGRGCTHRGGFTPR                          | 456 |
| Conserved |     | TSAGRGRERNRSNFRGERGGFRGGRG HRRGF PR                           |     |
| Human     | 421 | TSAGRGRERNRSNFRGERGGFRGGRGCAHRRGGFPPR                         | 456 |

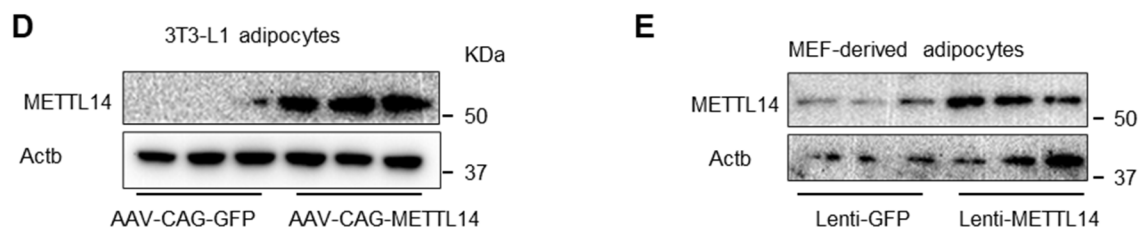

**Figure S5. Mettl14 cell-autonomously suppresses adipose lipolysis.** **A)** WAT was isolated from male mice (8 weeks) and stimulated with isoproterenol (1  $\mu$ M) for 3 h in the presence or absence of insulin (100 nM). Glycerol secretion rates were measured and normalized to WAT weights. **B)** MEFs were differentiated into adipocytes for 8 days using an adipose differentiation cocktail. Total TAG levels were measured and normalized to proteins (n=3 repeats per group). **C)** Comparison of mouse and human METTL14 amino acid sequences. **D)** 3T3-L1 cells were differentiated into adipocytes and transduced with AAV-CAG-METTL14 or AAV-CAG-GFP vectors (for 3 days). Cell lysates were immunoblotted with antibodies to METTL14 and Actb. **E)** MEFs were transduced with METTL14 or GFP lentiviral vectors and differentiated into adipocytes. Cell lysates were immunoblotted with antibodies to METTL14 and Actb. Data are presented as mean  $\pm$  SEM.



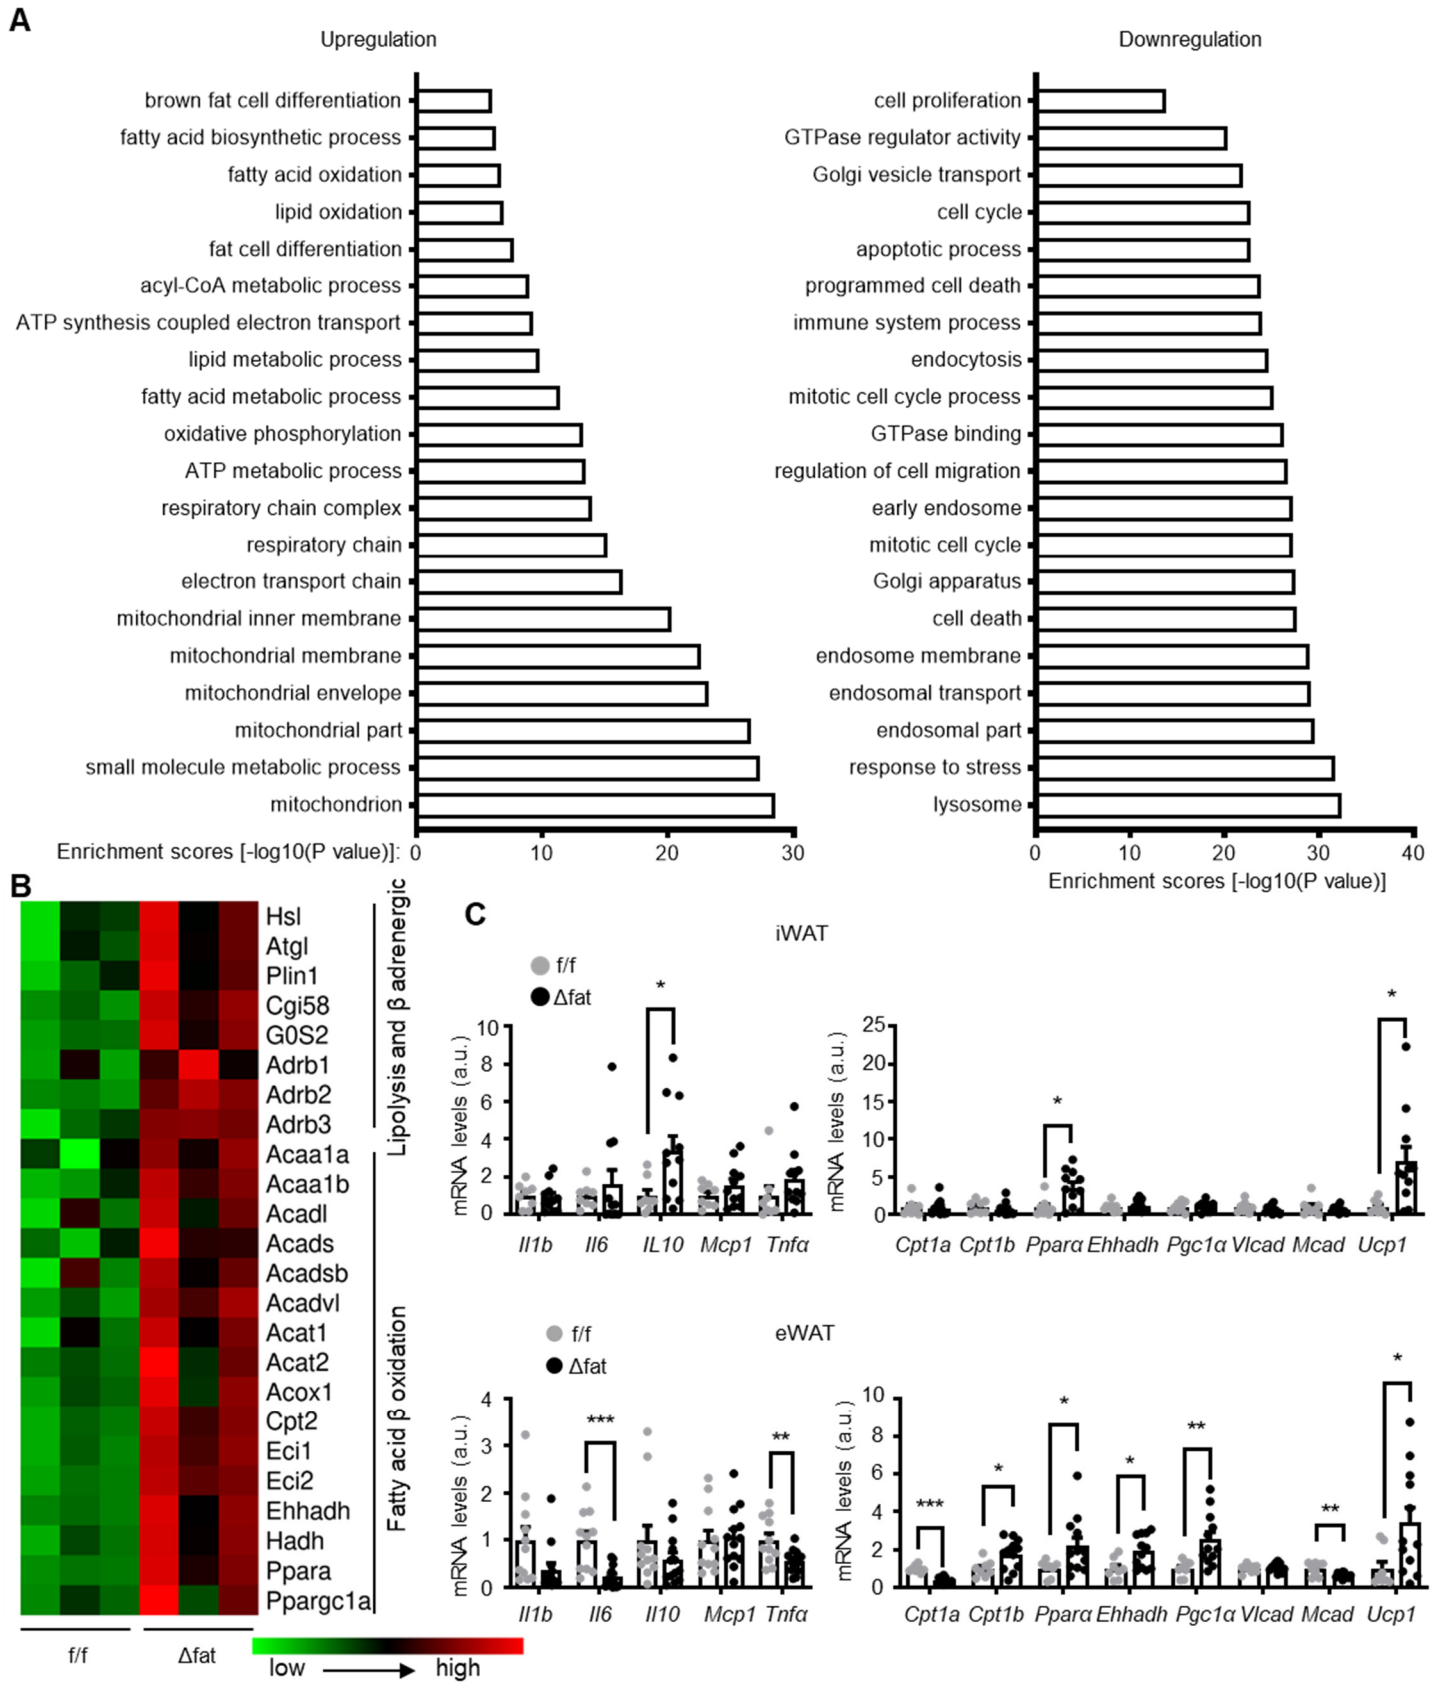

**Figure S6. Adipose *Mettl14* regulates the levels of lipolysis regulators and  $\beta$ -adrenergic signaling in adipocytes.** *Mettl14<sup>ff</sup>* and *Mettl14 $\Delta$ fat* males (8 weeks old) were fed a HFD for 16 weeks. **A-B)** eWAT was harvested for RNA-seq (n = 3). **A)** GO analyses of upregulated and downregulated genes. **B)** Gene

expression heatmap. **(C)** iWAT and eWAT gene expression was measured by qPCR and normalized to 36B4 levels. a.u.: arbitrary unit. iWAT *Mettl14<sup>f/f</sup>*: n=8, iWAT *Mettl14<sup>Δfat</sup>*: n=11, eWAT *Mettl14<sup>f/f</sup>*: n=8-11, eWAT *Mettl14<sup>Δfat</sup>*: n=11-13. Data are presented as mean ± SEM. \*p<0.05, \*\*p<0.01, \*\*\*p<0.001, Student's *t* test.

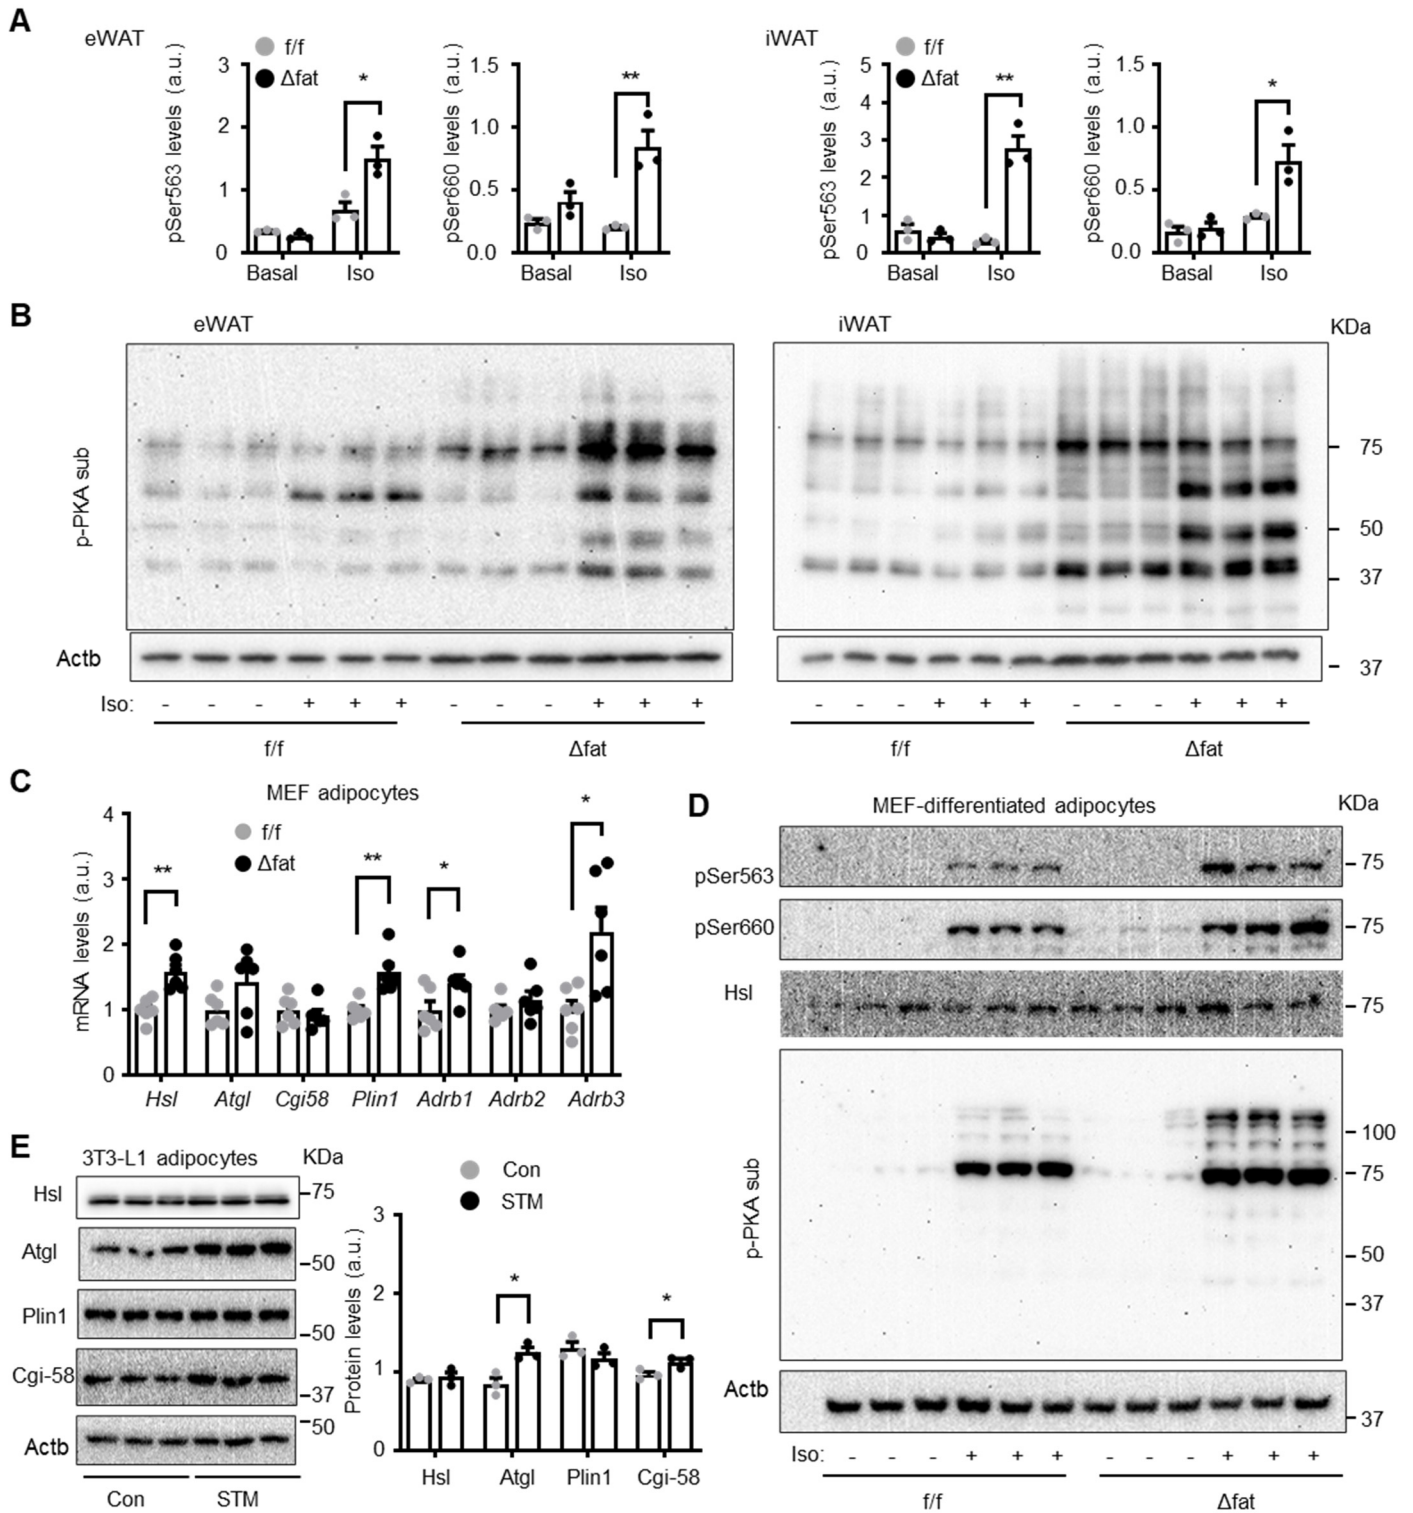

**Figure S7. Adipose Mettl14 regulates the levels of lipolysis regulators and  $\beta$ -adrenergic signaling in adipocytes.** **A-B)** Male mice (8 weeks) were fed a HFD for 4 weeks. iWAT and eWAT were isolated and stimulated with isoproterenol ( $1 \mu\text{M}$ ) for 15 min. **A)** WAT extracts were immunoblotted with antibodies to phospho-HSL (pSer563, pSer660), and pSer563 and pSer660 levels were quantified and normalized to total Hsl levels ( $n=3$  mice per group). a.u.: arbitrary unit. **B)** WAT extracts were immunoblotted with antibodies to pan-phospho-PKA substrates and Actb. **C)** MEF cells were differentiated into adipocytes for 8 days. mRNA levels were measured by qPCR and normalized to 36B4 levels ( $n=6$  repeats per group). **D)** MEFs were differentiated into adipocytes in vitro for 6 days, serum-deprived for 8 h, and stimulated with isoproterenol ( $1 \mu\text{M}$ ) for 15 min. Cell extracts were immunoblotted with the indicated antibodies. **E)** 3T3-L1 cells were differentiated into adipocytes and treated with STM2457 ( $5 \mu\text{M}$ ) for 48 h. Cell extracts were immunoblotted with the indicated antibodies. Protein levels were quantified and normalized to Actb levels ( $n=3$  repeats per group). Data are presented as mean  $\pm$  SEM. \* $p < 0.05$ , \*\* $p < 0.01$ , Student's  $t$  test.

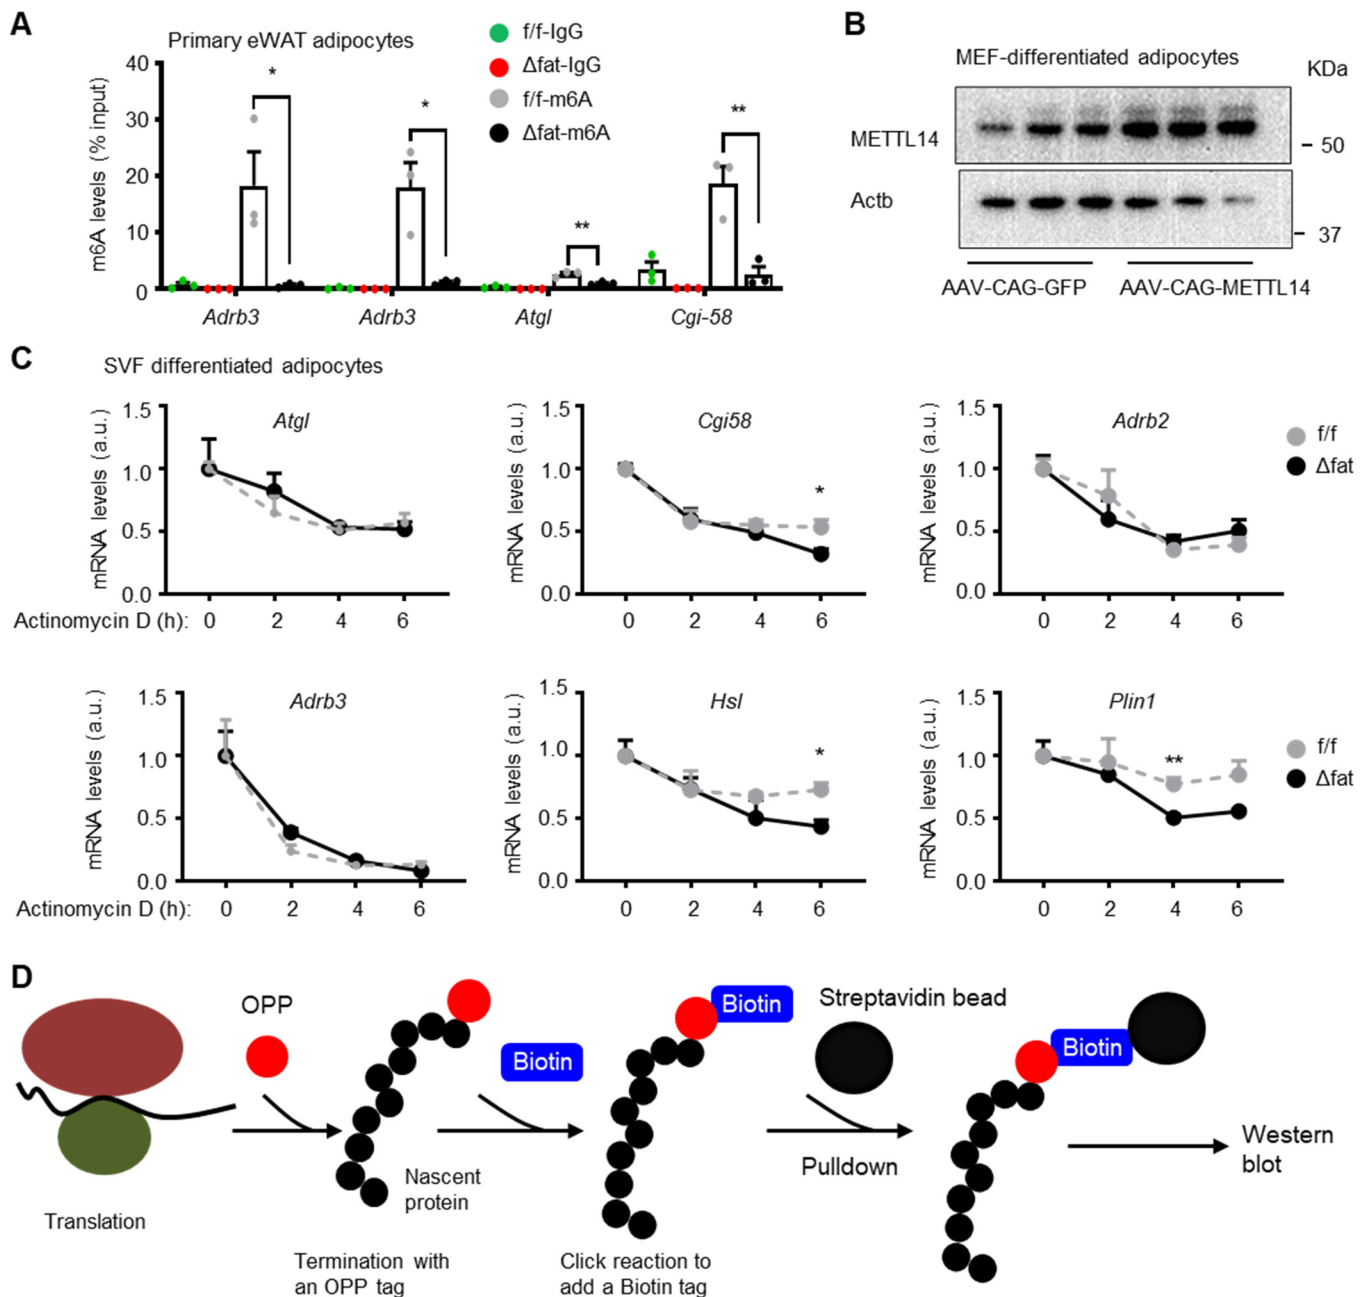

**Figure S8. Influences of Mettl14-mediated m6A modification on stability and translational efficiency of lipolysis-related transcripts.** **A)** Primary adipocytes were isolated from eWAT (8 weeks old) to extract total RNA. RNA was immunoprecipitated with anti-m6A antibody (a copy of the results of Figure 6A) or IgG. Precipitated RNA was extracted and used to measure the indicated transcripts by qPCR (normalized to inputs, n=3 mice per group). **B)** MEF-derived adipocytes were transduced with AAV vectors, and cell extracts were immunoblotted with the indicated antibodies. **C)** SVF cells were isolated from iWAT (8 weeks old) and differentiated into adipocytes. Adipocytes were treated with actinomycin D (1  $\mu$ M) for 0-6 h. Total RNA was extracted to measure mRNA abundance by qPCR (normalized to 18S levels). The results were presented as percentages of baseline values (n=3 repeats per group). a.u.: arbitrary unit. **D)** Schematic representation of OPP pulldown assays. Data are presented as mean  $\pm$  SEM. \*p<0.05, \*\*p<0.01, ANOVA.



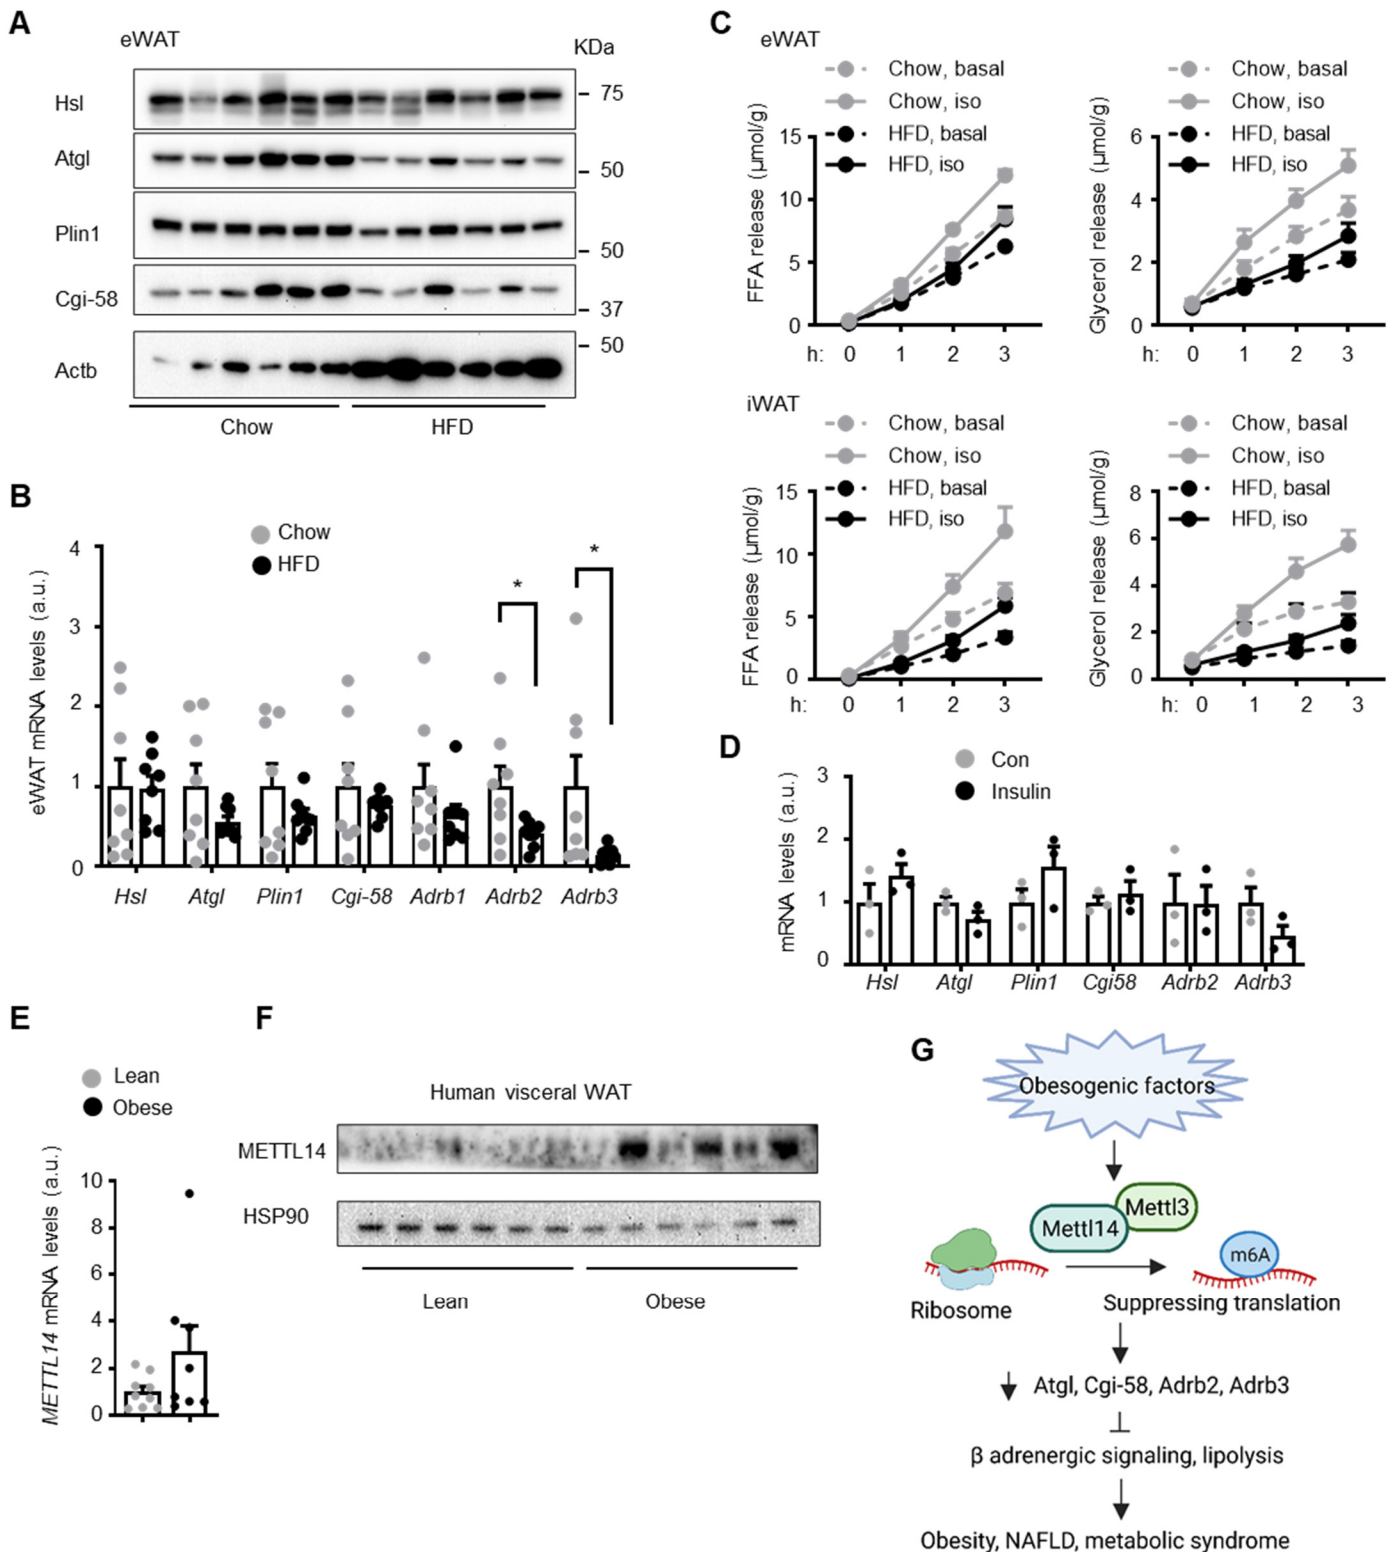

**Figure S9. Influences of Mettl14-mediated m6A modification on stability and translational efficiency of lipolysis-related transcripts.** C57BL/6J male mice (8 weeks old) were fed a HFD for 10 weeks. **A)** eWAT extracts were immunoblotted with the indicated antibodies. **B)** eWAT mRNA levels were measured by qPCR (normalized to 36B4 levels, n=8 mice per group). **C)** iWAT and eWAT explants were isolated and stimulated with isoproterenol (1  $\mu$ M, Iso) for 3 h. Glycerol- and FFA-releasing rates were measured and normalized to WAT weight. a.u.: arbitrary unit. Chow: n=7, HFD: n=6. **D)** 3T3-L1 cells were differentiated into adipocytes and stimulated with 5  $\mu$ g/ml insulin for 16 h. Gene expression was measured by qPCR and

normalized to 36B4 levels (n=4 repeats per group). **E-F**) Human visceral WAT samples were used to extract total RNA or prepare WAT extracts. **E**) Gene expression was measured by qPCR (normalized to 18S). Lean: n=9, obese: n=8. **F**) WAT extracts were immunoblotted with anti-METTL14 antibody. **G**) Obesogenic factors upregulate adipose METTL3/ and METTL14 that in turn install m6A in transcripts encoding  $\beta$  adrenergic (Adrb2/3) and lipolytic (Atgl/Cgi-58) pathway mediators. m6A methylation influences processing and suppresses translation of target mRNAs, thereby suppressing  $\beta$  adrenergic signaling (catecholamine resistance) and lipolysis to increase adipose expansion. Thus, adipose m6A-centric epitranscriptomic reprogramming promotes obesity, NAFLD, and metabolic disorders. Data are presented as mean  $\pm$  SEM. \*p<0.05, \*\*p<0.01, \*\*\*p<0.001, Student's *t* test.

| ANTIBODY       | SOURCE                    | Cat#       | Blot    |
|----------------|---------------------------|------------|---------|
| METTL3         | Proteintech Group         | 15073-1-AP | 1:1000  |
| METTL14        | Sigma                     | HPA038002  | 1:2000  |
| m6A            | Cell Signaling Technology | 56593      | 1:1000  |
| Actb           | Abclonal                  | AC026      | 1:20000 |
| pAkt (pThr308) | Cell Signaling Technology | 2965       | 1:1000  |
| pAkt (pSer473) | Cell Signaling Technology | 4060       | 1:1000  |
| Akt            | Cell Signaling Technology | 2920       | 1:1000  |
| pGSK3b         | Cell Signaling Technology | 5558       | 1:1000  |
| GSK3b          | Cell Signaling Technology | 9315       | 1:1000  |
| WTAP           | Proteintech Group         | 60188-1-Ig | 1:1000  |
| HSP90          | Cell Signaling Technology | 4877       | 1:2000  |
| pHSL (pSer563) | Cell Signaling Technology | 4139       | 1:1000  |
| pHSL (pSer660) | Cell Signaling Technology | 4126       | 1:1000  |
| HSL            | Cell Signaling Technology | 18381      | 1:1000  |
| Plin1          | Cell Signaling Technology | 9349       | 1:2000  |
| CGI-58         | Proteintech Group         | 12201-1-AP | 1:2000  |
| pPKA sub       | Cell Signaling Technology | 9624       | 1:1000  |
| ATGL           | Cell Signaling Technology | 2439       | 1:2000  |
| Adrb2          | Abclonal                  | A2048      | 1:1000  |
| Adrb3          | Santa Cruz                | sc-515763  | 1:500   |
| UCP1           | Cell Signaling Technology | 14670      | 1:5000  |

**Table S1.** Antibody list

| Genes          | Forward                | Reverse                 |
|----------------|------------------------|-------------------------|
| <i>Mettl3</i>  | AGCAGGACTCTGGGCACTT    | GCTTAGGGCCGCTAGAGGTA    |
| <i>36B4</i>    | AAGCGCGTCCTGGCATTGTCT  | CCGCAGGGGCAGCAGTGGT     |
| <i>Mettl14</i> | GCTTGCGAAAGTGGGGTTAC   | AATGAAGTCCCCGTCTGTGC    |
| <i>Hsl</i>     | ACGCTACACAAAGGCTGCTT   | TCGTTGCGTTTGTAGTGCTC    |
| <i>Atgl</i>    | TTCACCATCCGCTTGTTGGAG  | AGATGGTCACCCAATTTCTC    |
| <i>Cgi-58</i>  | TGGGGTTTTCTGAGCGAC     | GGTTAAAGGGAGTCAATGCTGC  |
| <i>Plin1</i>   | TCACCTACAGCACCTTGTG    | GGTGGAGGGAGTTTACACGA    |
| <i>Adrb1</i>   | GCTCTGGACTTCGGTAGATGTG | CGTCAGCAAACCTCTGGTAGCGA |
| <i>Adrb2</i>   | GAGCGACTACAAACCGTCACCA | TGGAAGTCCAGAACTCGCACCA  |
| <i>Adrb3</i>   | AGGCACAGGAATGCCACTCCAA | GCTTAGCCACAACGAACACTCG  |
| <i>IL6</i>     | AGCCAGAGTCCTTCAGA      | GGTCCTTAGCCACTCCT       |

|                           |                           |                          |
|---------------------------|---------------------------|--------------------------|
| <i>IL10</i>               | CTGGACAACATACTGCTAACCG    | CTGGACAACATACTGCTAACCG   |
| <i>Cpt1a</i>              | CTGATGACGGCTATGGTGTTT     | GTGAGGCCAAACAAGGTGATA    |
| <i>Mcp1</i>               | ACTGAAGCCAGCTCTCTCTTCCTC  | TTCCTTCTTGGGGTCAGCACAGAC |
| <i>Cpt1b</i>              | TCTGCATGTTTGACCCAAAA      | TTGCTGGAGATGTGGAAGAA     |
| <i>Ppara</i>              | CCTGAACATCGAGTGTGCAATA    | TCTTCTTCTGAATCTTGCAGCT   |
| <i>Tnfa</i>               | CATCTTCTCAAATTTCGAGTGACAA | TGGGAGTAGACAAGGTACAACCC  |
| <i>Pgc1a</i>              | TGGACGGAAGCAATTTTTCA      | TTACCTGCGCAAGCTTCTCT     |
| <i>Ehhadh</i>             | TGTGGGTTGGAAAGTTCGCAAAGG  | AATCGCCCAGCTTCACAGAGCATA |
| <i>Vlcad</i>              | 5-CTGAAGAATCCTTTTGGAAAC-3 | CCTTCTTGTGTTTCACCAGCT    |
| <i>Mcad</i>               | ACCCTGTGGAGAAGCTGATG      | AGCAACAGTGCTTGGAGCTT     |
| <i>Ucp1</i>               | ATACTGGCAGATGACGTCCC      | GTACATGGACATCGCACAGC     |
| <i>18S (human)</i>        | CGGCGACGACCCATTCGAAC      | GAATCGAACCCCTGATTCCCCGTC |
| <i>METTL14</i><br>(human) | GTAGCACAGACGGGGACTTC      | TTGGTCCAACCTGTGAGCCAG    |
| <i>ATGL</i><br>(human)    | CCACTTCAACTCCAAGGACGA     | GGCAGGTTGTCTGAAATGCC     |
| <i>CGI-58</i><br>(human)  | ACAGACCTGTCTATGCTTTTGAC   | AGGGCACATCTCCACTCTTCA    |
| <i>ADRB2</i><br>(human)   | GCCTGTGCTGATCTGGTCAT      | AATGGAAGTCCAAAACCTCGCA   |
| <i>ADRB3</i><br>(human)   | GACCAACGTGTTTCGTGACTTC    | GCACAGGGTTTCGATGCTG      |

**Table S2.** Primer list
